# Supplementary material
Source: Springer Nature journal article supplement (https://www.springermedizin.de/resource/supplementary/12967_2013_1732_MOESM4_ESM.pdf/9575180)

**A**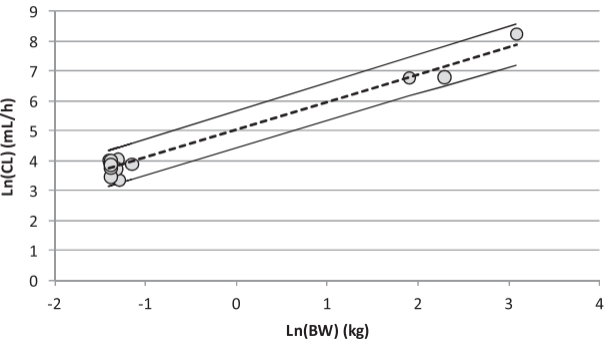**B**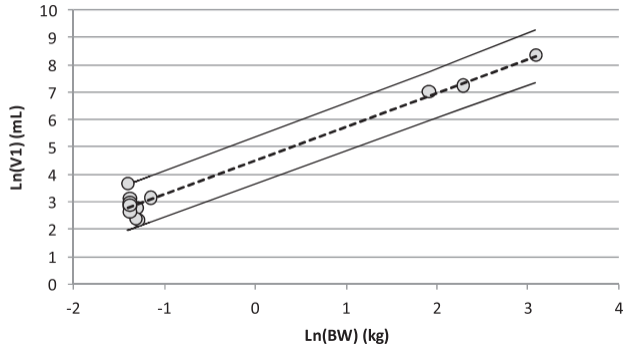

Supplement: MOESM4 [file 9575180]
